# Supplementary material for: 2D Coordination polymers of macrocyclic oxamide with polycarboxylates: syntheses, crystal structures and magnetic properties
Source: Royal Society of Chemistry journal article supplement (doi:10.1039/c2dt12281b), 2012-01-01
Supplement: c2dt12281b.pdf [file c2dt12281b.pdf]

## 2D Coordination Polymers of Macrocyclic Oxamide with Polycarboxylates: Syntheses, Crystal Structures and Magnetic Properties

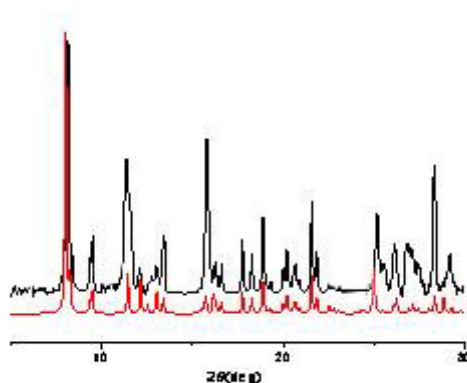

1

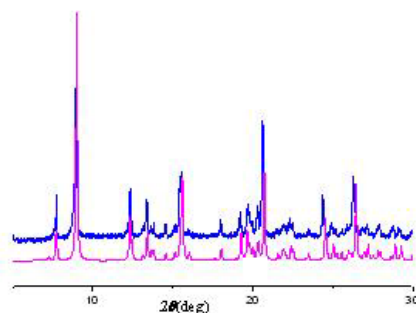

2

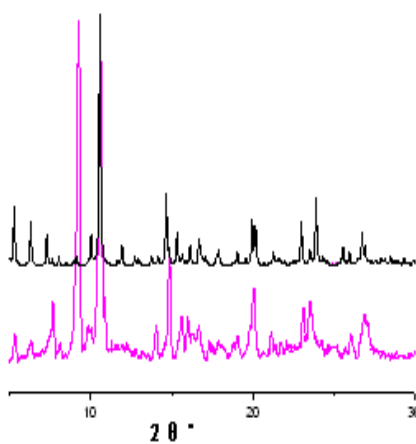

4

Fig.1 Experimental (black or blue) and simulated (red or purple) PXRD spectra of the complexes 1, 2 and 4

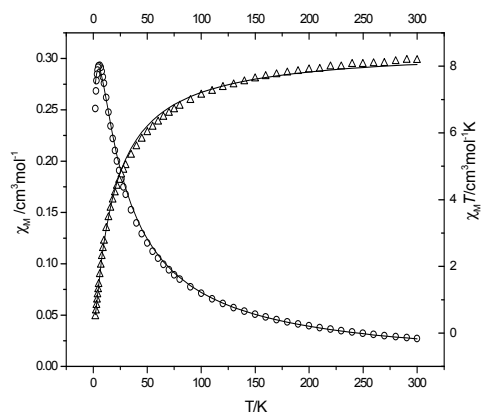

Fig. 2  $\chi_M(\text{O})$  versus  $T$  and  $\chi_M T(\Delta)$  versus plots for the complex 2
